# Supplementary material for: A CuMn2O4 spinel oxide as a superior catalyst for the aerobic oxidation of 5-hydroxymethylfurfural toward 2,5-furandicarboxylic acid in aqueous solvent
Source: Royal Society of Chemistry journal article supplement (doi:10.1039/d0cy01649g), 2020-11-26
Supplement: d0cy01649g1.pdf [file d0cy01649g1.pdf]

## Supplementary Information (ESI)

### Spinel $\text{CuMn}_2\text{O}_4$ oxide as a superior catalyst for the aerobic oxidation of 5-hydroxymethylfurfural toward 2,5-furandicarboxylic acid in water solvent

Xiaoyue Wan <sup>a,\*</sup>, Nannan Tang <sup>a</sup>, Qi Xie <sup>a</sup>, Shuangyan Zhao <sup>a</sup>, Chunmei Zhou <sup>a</sup>, Yihu Dai <sup>a</sup>, Yanhui Yang <sup>a,b \*</sup>

<sup>a</sup> Institute of Advanced Synthesis, School of Chemistry and Molecular Engineering, Jiangsu National Synergetic Innovation Center for Advanced Materials, Nanjing Tech University, Nanjing 211816, China

<sup>b</sup> State Key Laboratory for Oxo Synthesis and Selective Oxidation, Lanzhou Institute of Chemical Physics, Chinese Academy of Sciences, Lanzhou 730000, China

**Corresponding author:**

**E-mail:** [yhyang@njtech.edu.cn](mailto:yhyang@njtech.edu.cn) (Y. Yang); [ias\\_xywan@njtech.edu.cn](mailto:ias_xywan@njtech.edu.cn) (X. Wan).

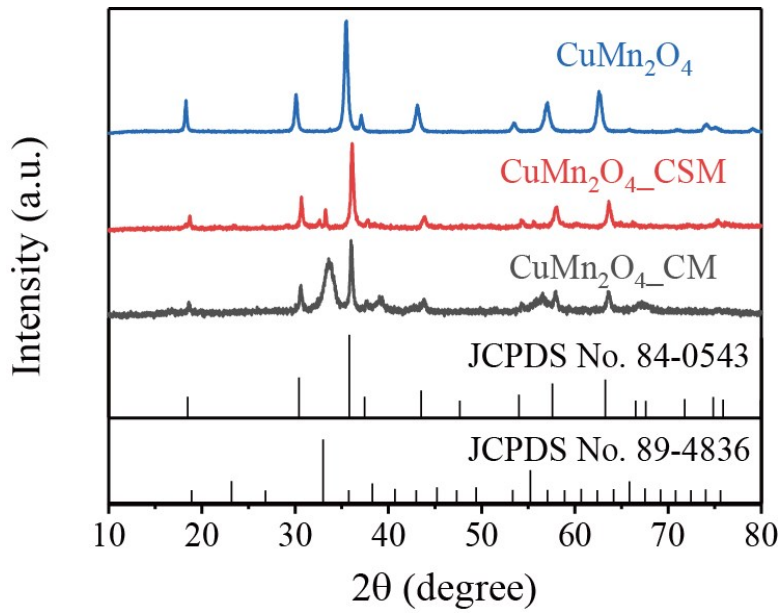

**Figure S1.** XRD patterns of  $\text{CuMn}_2\text{O}_4$ ,  $\text{CuMn}_2\text{O}_4\text{-CSM}$ , and  $\text{CuMn}_2\text{O}_4\text{-CM}$ , respectively.

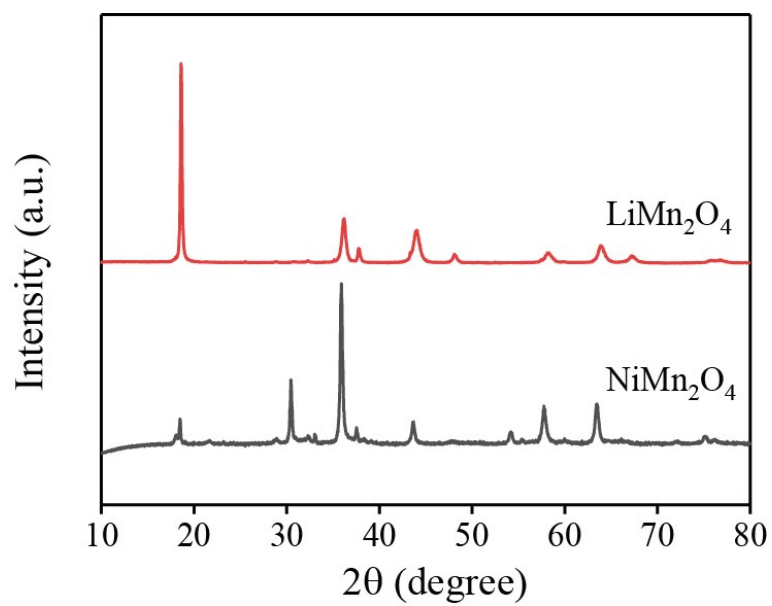

**Figure S2.** XRD patterns of  $\text{CuMn}_2\text{O}_4$ ,  $\text{LiMn}_2\text{O}_4$ , and  $\text{NiMn}_2\text{O}_4$ , respectively.

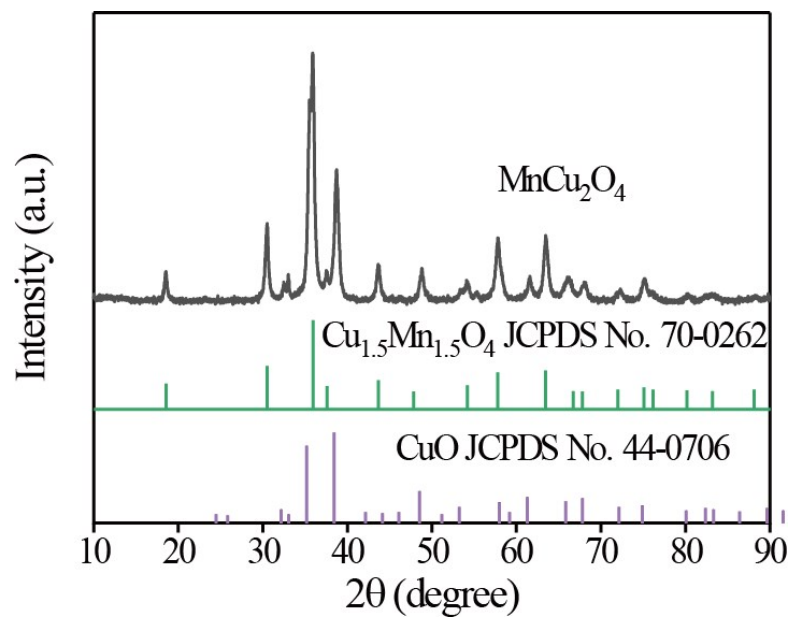

**Figure S3.** XRD patterns of MnCu<sub>2</sub>O<sub>4</sub>.

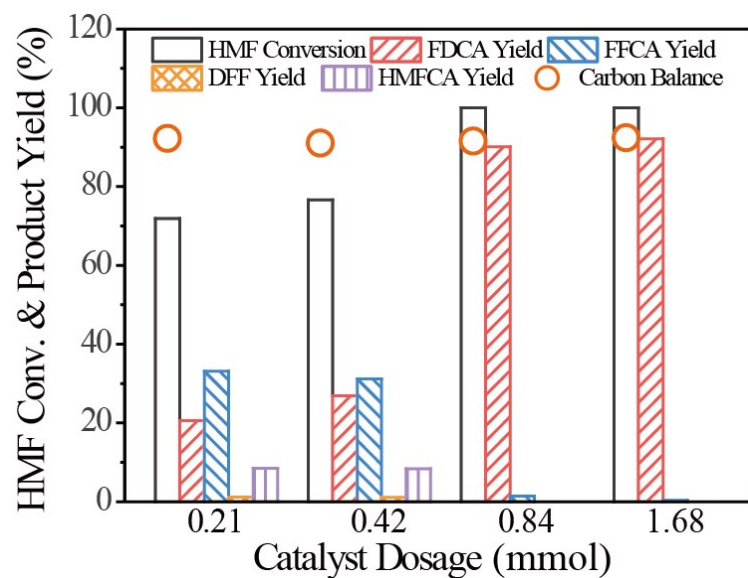

**Figure S4** Effect of the catalyst dosage on the aerobic oxidation of HMF over  $\text{CuMn}_2\text{O}_4$  spinel catalyst. Reaction conditions: 0.5 mmol HMF;  $\text{O}_2$ , 1 MPa;  $\text{H}_2\text{O}$ , 10 ml; temperature, 120 °C; reaction time, 18 h;  $n(\text{NaHCO}_3)/n(\text{HMF})=2$ .

**Table S1** Catalytic behavior with none oxide catalysts for aerobic oxidation of HMF.<sup>a</sup>

| Conv.<br>(%) | Yield <sup>b</sup> (%) |      |        |      | Carbon<br>Balance <sup>c</sup><br>(%) | Others <sup>d</sup> |
|--------------|------------------------|------|--------|------|---------------------------------------|---------------------|
|              | DFF                    | FFCA | HMFCFA | FDCA |                                       |                     |
| 65.4         | 1.31                   | 8.25 | 1.05   | 3.34 | 44.8                                  | 20.0                |

<sup>a</sup>Reaction conditions: 0.5 mmol HMF; none oxide catalyst; O<sub>2</sub>, 1.0 MPa; H<sub>2</sub>O, 10 ml; temperature, 120 °C; reaction time, 18 h; NaHCO<sub>3</sub>/HMF=2. <sup>b</sup>DFF, HMFCFA, FFCA, and FDCA denote 2,5-diformylfuran, 5-hydroxymethyl-2-furancarboxylic acid, 5-formyl-2-furan-carboxylic acid, and 2,5-furandicarboxylic acid, respectively. <sup>c</sup> Carbon Balance based on the detectable products including DFF, FFCA, HMFCFA, FDCA, formic acid, levulinic acid, 2,5-furandimethanol (DHMF) and so on. <sup>d</sup> Others includes humin and other undetectable products by HPLC.

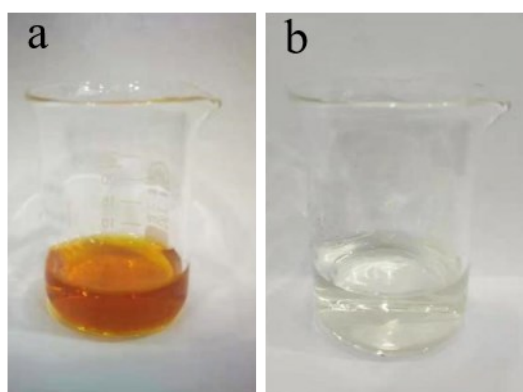

**Figure S5** Photos of centrifugated liquid after reaction. Reaction conditions: (a) 0.5 mmol HMF; none oxide catalyst; O<sub>2</sub>, 1.0 MPa; H<sub>2</sub>O, 10 ml; temperature, 120 °C; reaction time, 18 h; NaHCO<sub>3</sub>/HMF=2. (b) 0.5 mmol HMF; 0.84 mmol CuMn<sub>2</sub>O<sub>4</sub> catalyst; O<sub>2</sub>, 1.0 MPa; H<sub>2</sub>O, 10 ml; temperature, 120 °C; reaction time, 18 h; NaHCO<sub>3</sub>/HMF=2.

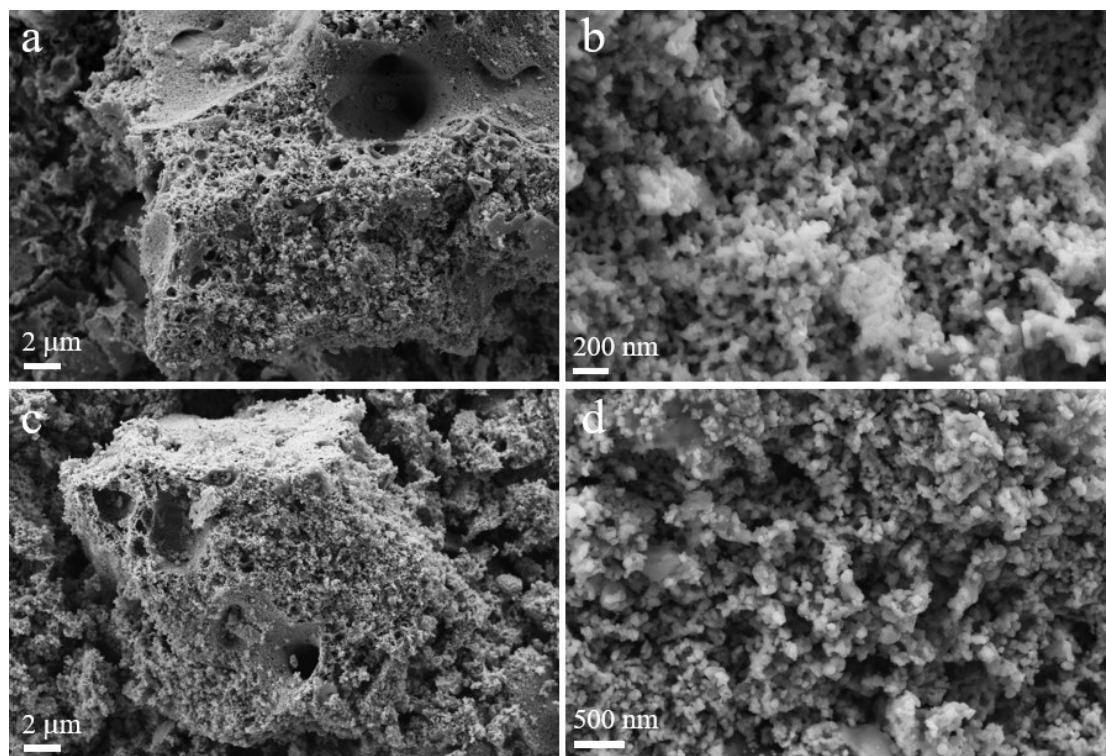

**Figure S6** SEM images of (a, b)  $\text{CuMn}_2\text{O}_4$  and (c, d)  $\text{CuMn}_2\text{O}_4$  catalyst after the 6-time-repeatability by regeneration *via* calcination in air at 500 °C for 3 h.



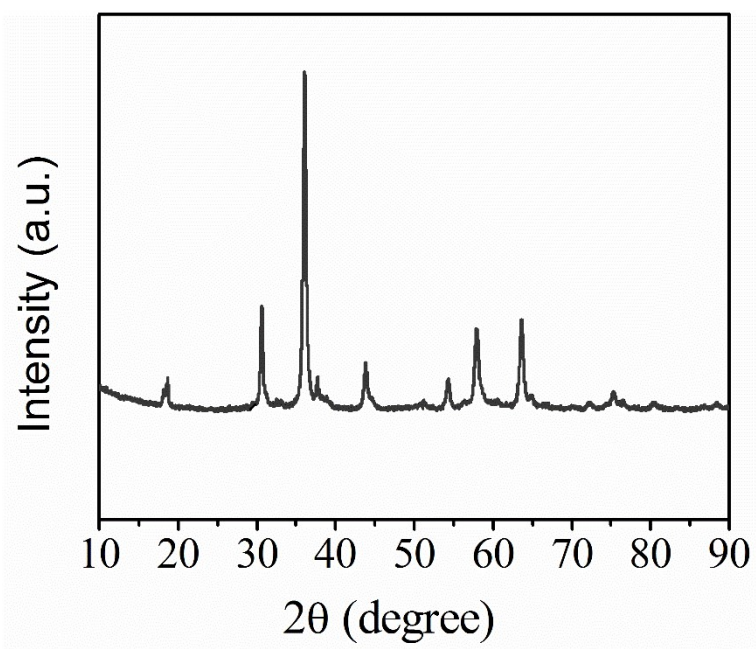

**Figure S7** XRD of  $\text{CuMn}_2\text{O}_4$  after the 6-time-repeatability by regeneration *via* calcination in air at 500 °C for 3 h.

**Table S2** Catalytic behavior of different oxides catalysts for aerobic oxidation of HMF.<sup>a</sup>

| Catalyst                         | Dosage (g) | Time (h) | HMF<br>Conv. (%) | Select. (%) |      |        |      |
|----------------------------------|------------|----------|------------------|-------------|------|--------|------|
|                                  |            |          |                  | DFE         | FFCA | HMFCFA | FDCA |
| CuMn <sub>2</sub> O <sub>4</sub> | 0.2        | 0.5      | 13.0             | 19.2        | 57.2 | 19.2   | 4.5  |
| MnCu <sub>2</sub> O <sub>4</sub> | 0.2        | 1        | 24.2             | 23.3        | 70.9 | 0.0    | 5.8  |
| CuO                              | 0.2        | 1        | 19.0             | 30.9        | 25.4 | 0.0    | 28.6 |
| Mn <sub>2</sub> O <sub>3</sub>   | 0.1        | 0.5      | 13.1             | 30.2        | 60.6 | 0.0    | 5.2  |

<sup>a</sup>Reaction conditions: 0.5 mmol HMF, 10 ml H<sub>2</sub>O, 120 °C, 1.0 MPa O<sub>2</sub>, 1.0 mmol NaHCO<sub>3</sub>.

**Table S3** Catalytic behavior of different oxides catalysts for aerobic oxidation of DFF.<sup>a</sup>

| Catalyst                                      | Dosage (g) | Time (h) | DFF Conv. (%) | Select. (%) |      |
|-----------------------------------------------|------------|----------|---------------|-------------|------|
|                                               |            |          |               | FFCA        | FDCA |
| CuMn <sub>2</sub> O <sub>4</sub>              | 0.05       | 0.5      | 24.4          | 89.7        | 10.3 |
| MnCu <sub>2</sub> O <sub>4</sub> <sup>b</sup> | 0.05       | 0.5      | 24.3          | 2.3         | 97.7 |
| CuO                                           | 0.025      | 0.5      | 18.8          | 96.0        | 4.0  |
| Mn <sub>2</sub> O <sub>3</sub>                | 0.02       | 0.5      | 25.6          | 1.6         | 98.4 |

<sup>a</sup>Reaction conditions: 2.0 mmol DFF, 10 ml H<sub>2</sub>O, 120 °C, 1.0 MPa O<sub>2</sub>, 1.0 mmol NaHCO<sub>3</sub>.

<sup>b</sup>Reaction conditions: 1.0 mmol DFF, 10 ml H<sub>2</sub>O, 120 °C, 1.0 MPa O<sub>2</sub>, 1.0 mmol NaHCO<sub>3</sub>.

**Table S4** Catalytic behavior of different oxides catalysts for aerobic oxidation of FFCA<sup>a</sup>

| Catalyst                         | Dosage (g) | Time (h) | FFCA Conv. (%) | Select. /%<br>FDCA |
|----------------------------------|------------|----------|----------------|--------------------|
| CuMn <sub>2</sub> O <sub>4</sub> | 0.3        | 1.0      | 12.8           | 100                |
| MnCu <sub>2</sub> O <sub>4</sub> | 0.3        | 1.5      | 12.7           | 100                |
| CuO                              | 0.3        | 24       | 14.0           | 100                |
| Mn <sub>2</sub> O <sub>3</sub>   | 0.1        | 0.5      | 13.9           | 100                |

<sup>a</sup>Reaction conditions: 0.5 mmol FFCA, 10 ml H<sub>2</sub>O, 120 °C, 1.0 MPa O<sub>2</sub>, 1.0 mmol NaHCO<sub>3</sub>.

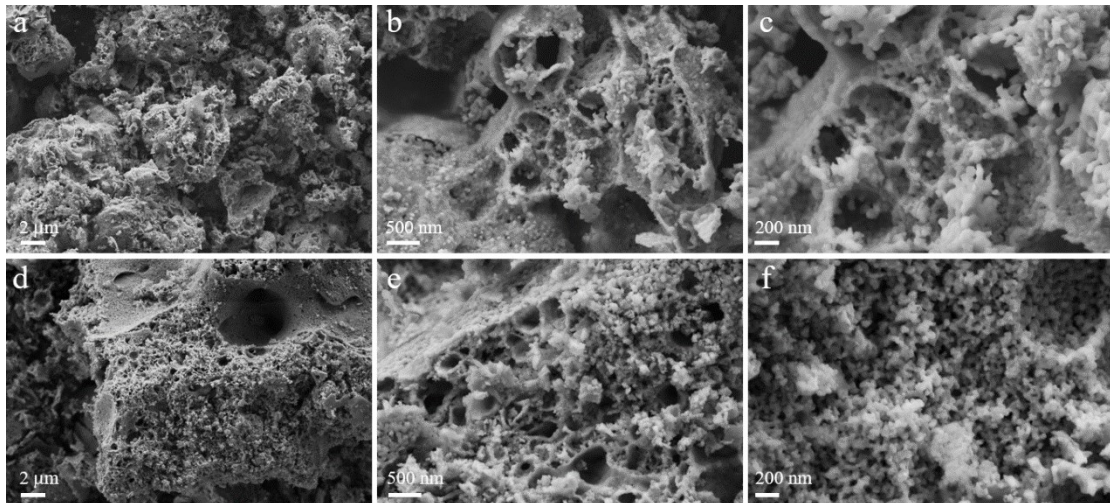

**Figure S8** SEM images of (a, b, c) MnCu<sub>2</sub>O<sub>4</sub> and (d, e, f) CuMn<sub>2</sub>O<sub>4</sub>.

**Table S5** The ICP results of  $\text{CuMn}_2\text{O}_4$  and  $\text{MnCu}_2\text{O}_4$ .

| Catalyst                  | Concentration (mg/L) |      | Cu: Mn Ratio | Mother Liquor Concentration in Preparation |
|---------------------------|----------------------|------|--------------|--------------------------------------------|
|                           | Cu                   | Mn   |              |                                            |
| $\text{CuMn}_2\text{O}_4$ | 8.77                 | 15.1 | 1: 1.99      | 1:2                                        |
| $\text{MnCu}_2\text{O}_4$ | 16.075               | 6.92 | 1.99: 1      | 2:1                                        |

Composition analysis of the powders by ICP

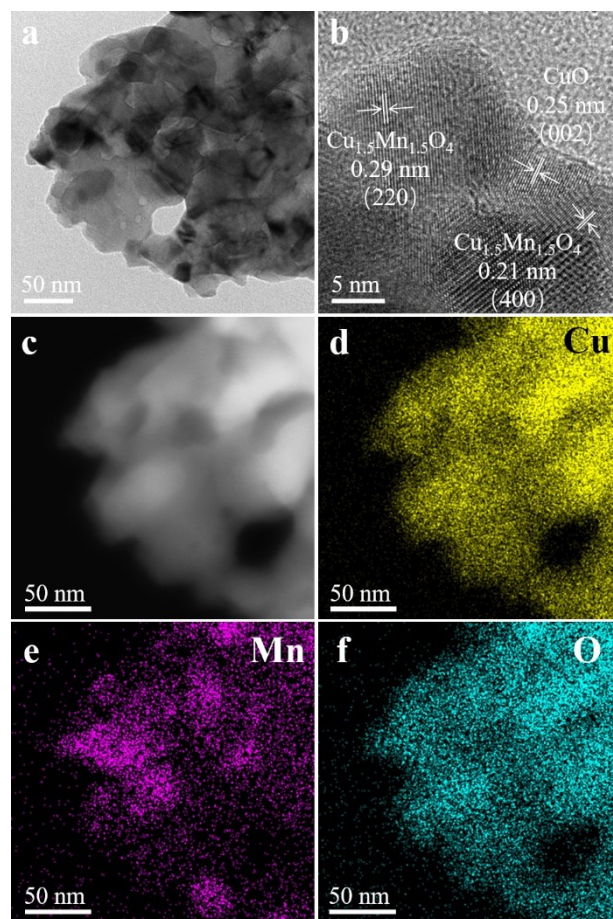

**Figure S9.** The TEM (a), HRTEM (b), HAADF-STEM (c) images and corresponding EDS mapping of Cu (d), Mn (e) and O (f) elements, respectively, of MnCu<sub>2</sub>O<sub>4</sub> catalysts.

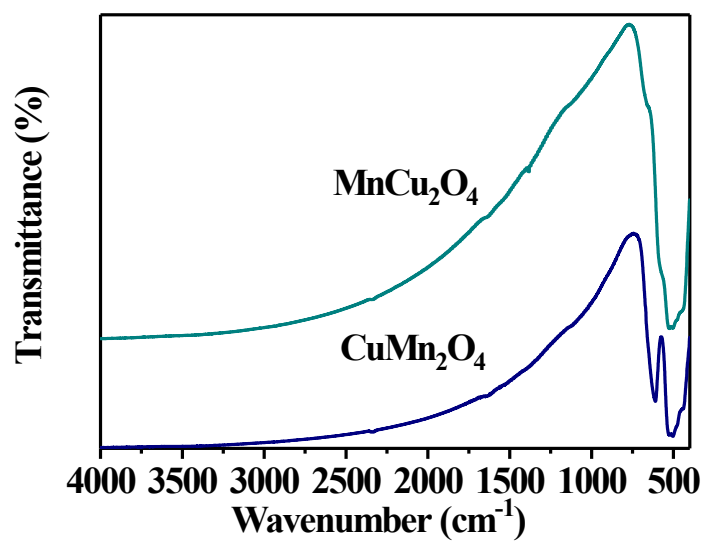

**Figure S10** The FT- IR spectra of CuMn<sub>2</sub>O<sub>4</sub> and MnCu<sub>2</sub>O<sub>4</sub> samples



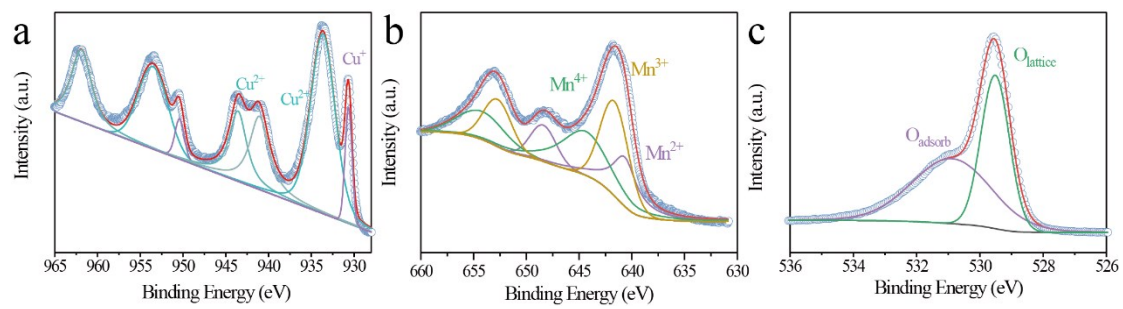

**Figure S11** Deconvoluted XPS spectra of Cu 2p, Mn 2p, O 1s orbital levels from the MnCu<sub>2</sub>O<sub>4</sub> catalysts.

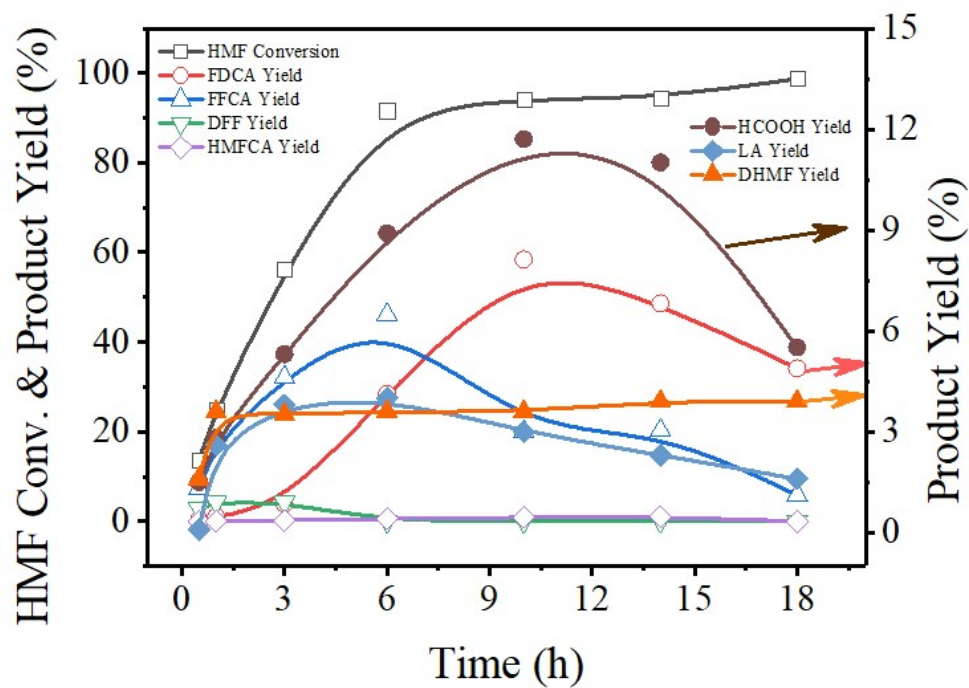

**Figure S12** Time course of the aerobic oxidation of HMF over  $\text{Mn}_2\text{O}_3$  catalyst.

Reaction conditions: 0.5 mmol HMF, 1.64 mmol  $\text{Mn}_2\text{O}_3$  catalyst, 10 ml  $\text{H}_2\text{O}$ , 120 °C, 1.0 MPa  $\text{O}_2$ ,  $n(\text{NaHCO}_3)/n(\text{HMF})=2$ .

**Table S6** The anaerobic experiments of CuMn<sub>2</sub>O<sub>4</sub> spinel catalyst in the oxidation of HMF.

| Time<br>(h) | Conv. (%)<br>HMF | Yield (%) |      |        |      | Amount of<br>O <sub>ins</sub> (μmol) |
|-------------|------------------|-----------|------|--------|------|--------------------------------------|
|             |                  | DFP       | FFCA | HMFCFA | FDCA |                                      |
| 3           | 8.4              | 2.7       | 2.16 | 1.6    | 1.7  | 34.3                                 |
| 4           | 9.4              | 2.0       | 2.0  | 1.0    | 2.5  | 36.2                                 |
| 8           | 14.6             | 4.4       | 3.8  | 0.8    | 2.7  | 52.3                                 |

Reaction conditions: 0.25 mmol HMF, 0.84 mmol catalyst, 20 ml H<sub>2</sub>O, 120 °C, N<sub>2</sub>: 1 MPa
